# Supplementary material for: Velocity map imaging with no spherical aberrations
Source: Royal Society of Chemistry journal article supplement (doi:10.1039/d3cp03693f), 2023-01-01
Supplement: d3cp03693f1.pdf [file d3cp03693f1.pdf]

## Supplementary Information for "Velocity Map Imaging with No Spherical Aberrations"

Yehuda Ben-Shabo<sup>1</sup>, Adeliya Kurbanov<sup>1</sup>, Claus Dieter Schröter<sup>2</sup>, Robert Moshhammer<sup>2</sup>, Holger Kreckel<sup>2</sup>, Yoni Toker<sup>1</sup>

<sup>1</sup>*Department of Physics and Institute of Nanotechnology and Advanced Materials,  
Bar-Ilan University, Ramat-Gan 5290002, Israel*

<sup>2</sup>*Max-Planck-Institut für Kernphysik,  
Saupfercheckweg 1, 69117 Heidelberg, Germany*

### I. FULL DERIVATIONS

#### A. Expression for time-of-flight

The time-of-flight of particles to the detectors is determined by plugging  $z(t_f) = L$  into Eq. 4 from the main manuscript:

$$L = z(t_f) = \left( z_0 + \frac{U_z}{4U_\rho} \right) \cosh\left(\sqrt{2}\omega_\rho t_f\right) + \frac{v_z^0}{\sqrt{2}\omega_\rho} \sinh\left(\sqrt{2}\omega_\rho t_f\right) - \frac{U_z}{4U_\rho} \quad (1)$$

This equation is of the form:

$$C = A \cosh(x) + B \sinh(x) \quad (2)$$

where:

$$A = z_0 + \frac{U_z}{4U_\rho} \quad (3)$$

$$B = \frac{v_z^0}{\sqrt{2}\omega_\rho} \quad (4)$$

and

$$C = L + \frac{U_z}{4U_\rho}. \quad (5)$$

If  $|A| > |B|$  we can define:

$$A = \alpha \cosh(\beta), \quad B = \alpha \sinh(\beta) \quad (6)$$

With

$$\alpha = \sqrt{A^2 - B^2} = \sqrt{\left( z_0 + \frac{U_z}{4U_\rho} \right)^2 - \left( \frac{v_z^0}{\sqrt{2}\omega_\rho} \right)^2} \quad (7)$$

and

$$\beta = \tanh^{-1}\left(\frac{B}{A}\right) = \tanh^{-1}\left(\frac{\sqrt{2}\omega_\rho}{v_z^0} \left( z_0 + \frac{U_z}{4U_\rho} \right)\right) \quad (8)$$

, so that

$$C = \alpha(\cosh(\beta)\cosh(x) + \sinh(\beta)\sinh(x)) = \alpha \cosh(\beta + x). \quad (9)$$

Consequently:

$$\sqrt{2}\omega_\rho t_f = x = \cosh^{-1}\left(\frac{C}{\alpha}\right) - \beta. \quad (10)$$

Plugging in the values for  $C$ ,  $\alpha$  and  $\beta$  leads to:

$$t_f = \frac{1}{\sqrt{2}\omega_\rho} \left[ \cosh^{-1} \left( \frac{L + \frac{U_z}{4U_\rho}}{\sqrt{\left(z_0 + \frac{U_z}{4U_\rho}\right)^2 - \left(\frac{v_z^0}{\sqrt{2}\omega_\rho}\right)^2}} \right) - \tanh^{-1} \left( \frac{v_z^0}{\sqrt{2}\omega_\rho} \cdot \frac{1}{z_0 + \frac{U_z}{4U_\rho}} \right) \right] \quad (11)$$

In the case where  $|A| < |B|$  we use a similar derivation with:

$$C = \cosh(x) + B \sinh(x) = \alpha(\sinh(\beta)\cosh(x) + \cosh(\beta)\sinh(x)) = \alpha \sinh(\beta + x) \quad (12)$$

where

$$A = \alpha \sinh(\beta) = z_0 + \frac{U_z}{4U_\rho} \quad B = \alpha \cosh(\beta) = \frac{v_z^0}{\sqrt{2}\omega_\rho} \quad (13)$$

$$C = L + \frac{U_z}{4U_\rho} \quad (14)$$

$$\alpha = \sqrt{B^2 - A^2} = \sqrt{\left(\frac{v_z^0}{\sqrt{2}\omega_\rho}\right)^2 - \left(z_0 + \frac{U_z}{4U_\rho}\right)^2} \quad (15)$$

and

$$\beta = \tanh^{-1}\left(\frac{A}{B}\right) = \tanh^{-1}\left(\frac{\sqrt{2}\omega_\rho}{v_z^0}\left(z_0 + \frac{U_z}{4U_\rho}\right)\right). \quad (16)$$

leading to:

$$\sqrt{2}\omega_\rho t_f = x = \sinh^{-1}\left(\frac{C}{\alpha}\right) - \beta \quad (17)$$

$$t_f = \frac{1}{\sqrt{2}\omega_\rho} \left[ \sinh^{-1} \left( \frac{L + \frac{U_z}{4U_\rho}}{\sqrt{\left(z_0 + \frac{U_z}{4U_\rho}\right)^2 - \left(\frac{v_z^0}{\sqrt{2}\omega_\rho}\right)^2}} \right) - \tanh^{-1} \left( \frac{v_z^0}{\sqrt{2}\omega_\rho} \cdot \frac{1}{z_0 + \frac{U_z}{4U_\rho}} \right) \right] \quad (18)$$

## B. Second order expansion of impact position

We perform expansion of Eq. 11 around  $v_z^0 = z_0 = 0$ . Noting that:

$$\left(\frac{dt_f}{dz_0}\right)_{v_z^0=z_0=0} = \frac{1}{\sqrt{2}\omega_\rho} \left[ \frac{\frac{dx}{dz_0}}{\sqrt{x^2-1}} + \frac{\frac{dy}{dz_0}}{1-y^2} \right]_{v_z^0=z_0=0} = -\frac{2\beta+1}{\sqrt{2+2/\beta}} \frac{1}{\omega_\rho L} \quad (19)$$

and:

$$\left(\frac{dt_f}{dv_z^0}\right)_{v_z^0=z_0=0} = \frac{1}{\sqrt{2}\omega_\rho} \left[ \frac{\frac{dx}{dv_z^0}}{\sqrt{x^2-1}} + \frac{\frac{dy}{dv_z^0}}{1-y^2} \right]_{v_z^0=z_0=0} = \frac{\beta}{\omega_\rho^2 L} \quad (20)$$

Leads to:

$$t_f = \frac{\cosh^{-1}(2\beta + 1)}{\sqrt{2}\omega_\rho} - \frac{2\beta + 1}{\sqrt{2 + 2/\beta}} \frac{1}{\omega_\rho L} z_0 + \frac{\beta}{\omega_\rho^2 L} v_z^0 + \dots \quad (21)$$

Expanding the expression for  $\rho_f$  around  $\omega_\rho t_f = \pi/2$  leads to:

$$\rho_f = \rho_0 \cos(\omega_\rho t_f) + \frac{v_\rho^0}{\omega_\rho} \sin(\omega_\rho t_f) \simeq -\rho_0 \omega_\rho \Delta t_f + \frac{v_\rho^0}{\omega_\rho} \quad (22)$$

$$\rho_f = \frac{v_\rho^0}{\omega_\rho} + \frac{1}{2^{3/2}} \left( \frac{4\beta^2 + 2\beta}{\sqrt{\beta^2 + \beta}} \right) \frac{1}{L} \rho_0 z_0 - \frac{\beta}{\omega_\rho L} \rho_0 v_z^0 = \frac{v_\rho^0}{\omega_\rho} + 1.38 \frac{\rho_0 z_0}{L} - \frac{0.9161}{\omega_\rho L} \rho_0 v_z^0 \quad (23)$$
